## Effects of Intravenous Anesthetics on $Ca^{2+}$ Sensitivity in Canine Tracheal Smooth Muscle

Motohiko Hanazaki, M.D.,\* Keith A. Jones, M.D.,† David O. Warner, M.D.‡

**Background:** Halothane and other volatile anesthetics relax airway smooth muscle in part by decreasing the amount of force produced for a particular intracellular calcium concentration (the  $Ca^{2+}$  sensitivity) during muscarinic receptor stimulation. In this study, ketamine, propofol, and midazolam were evaluated to determine whether the inhibitory effect of volatile anesthetics on this signal transduction pathway is a general property of other types of anesthetic drugs.

**Methods:** A  $\beta$ -escin permeabilized canine tracheal smooth muscle preparation was used. Ketamine, propofol, and midazolam, in concentrations producing near-maximal relaxation in intact airway smooth muscle (200  $\mu M$ , 270  $\mu M$ , and 100  $\mu M$ , respectively), were applied to permeabilized muscles stimulated with calcium in either the absence or the presence of muscarinic receptor stimulation provided by acetylcholine. The effect of halothane also was evaluated.

**Results:** Confirming previous studies, halothane (0.75 mM) decreased calcium sensitivity during muscarinic receptor stimulation. None of the intravenous anesthetics studied affected  $Ca^{2+}$  sensitivity, either in the absence or the presence of muscarinic receptor stimulation.

**Conclusions:** Intravenous anesthetics in high concentrations directly relax canine tracheal smooth muscle without affecting  $Ca^{2+}$  sensitivity. The inhibition of agonist-induced increases in  $Ca^{2+}$  sensitivity of canine tracheal smooth is not a common property of anesthetics, but is unique to volatile agents. (Key words: Airways; bronchodilators; G proteins; intracellular calcium concentration.)

\* Research Fellow, Department of Anesthesiology, Mayo Clinic and Mayo Foundation. Current position: Staff Anesthesiologist, Department of Anesthesiology and Resuscitology, Okayama University Medical School, Okayama, Japan.

† Associate Professor of Anesthesiology, Mayo Medical School.

‡ Professor of Anesthesiology, Mayo Medical School.

Received from the Departments of Anesthesiology and Physiology and Biophysics, Mayo Clinic and Mayo Foundation, Rochester, Minnesota. Submitted for publication January 14, 1999. Accepted for publication July 12, 1999. Supported in part by grants no. HL-45532 and HL-54757 from the National Institutes of Health, Bethesda, Maryland; and grants from the Mayo Foundation, Rochester, Minnesota. Dr. Hanazaki was sponsored by Dr. Masahisa Hirakawa, Professor and Chairman, Department of Anesthesiology and Resuscitology, Okayama University Medical School, Okayama, Japan.

Address reprint requests to Dr. Warner: Mayo Clinic and Foundation, 200 First Street SW, Rochester, Minnesota 55905. Address electronic mail to: warner.david@mayo.edu

CONTRACTION of smooth muscle in response to physiologic agonists is associated with an increase in the concentration of cytosolic  $Ca^{2+}$  ( $[Ca^{2+}]_i$ ). However, contractile force is not determined by  $[Ca^{2+}]_i$  alone in smooth muscle because membrane receptor stimulation with various receptor agonists increases force developed at a constant  $[Ca^{2+}]_i$  (i.e., increases  $Ca^{2+}$  sensitivity).<sup>1,2</sup> We showed that halothane directly relaxes airway smooth muscle, not only by decreasing  $[Ca^{2+}]_i$ ,<sup>3</sup> but also by decreasing  $Ca^{2+}$  sensitivity during membrane receptor stimulation.<sup>1,4</sup> At the equivalent minimum alveolar concentration (MAC), sevoflurane has a lesser effect on  $Ca^{2+}$  sensitivity, and isoflurane has a small, insignificant effect.<sup>5</sup> Thus, at concentrations equipotent for producing anesthesia, volatile anesthetics differ in the ability to inhibit  $Ca^{2+}$  sensitivity in airway smooth muscle.

Data concerning the effects of other types of anesthetics on  $Ca^{2+}$  sensitivity in airway smooth muscle are few. Three intravenous drugs used clinically to induce anesthesia have been reported to directly relax airway smooth muscle, and thus might inhibit calcium sensitivity. Ketamine and propofol appear to be clinically useful in the treatment of patients with hyper-reactive airways. These agents inhibit neural pathways, innervating smooth muscle, and also directly relax airway and other types of smooth muscle.<sup>6-9</sup> This direct relaxation is associated with a decrease in  $[Ca^{2+}]_i$  caused by an inhibition of  $Ca^{2+}$  influx.<sup>6,10</sup> It is not known whether these drugs may also affect  $Ca^{2+}$  sensitivity. Midazolam also directly relaxes airway smooth muscle and decreases  $[Ca^{2+}]_i$ ,<sup>11,12</sup> however, one study of intact airway smooth muscle found that it does not affect  $Ca^{2+}$  sensitivity.<sup>11</sup>

In the current study, we determined the effects of three intravenous anesthetics on  $Ca^{2+}$  sensitivity in airway smooth muscle using a permeabilized canine tracheal smooth muscle (CTSM) preparation in which  $Ca^{2+}$  sensitivity can be directly assessed.<sup>1</sup> Ketamine, propofol, and midazolam were evaluated to determine whether the previously observed inhibitory effect of halothane on agonist-induced increase in  $Ca^{2+}$  sensitivity in airway

smooth muscle is shared by intravenous anesthetics that also relax airway smooth muscle.

## Materials and Methods

### *Tissue Preparation*

After approval by the Institutional Animal Care and Use Committee, mongrel dogs (20–25 kg) of either sex were anesthetized using an intravenous injection of sodium pentobarbital (50 mg/kg) and were killed by exsanguination. A 10- to 15-cm portion of extrathoracic trachea was excised and immersed in chilled physiologic salt solution of the following composition: NaCl: 110.5 mM; NaHCO<sub>3</sub>: 25.7 mM; dextrose: 5.6 mM; KCl: 3.4 mM; CaCl<sub>2</sub>: 2.4 mM; KH<sub>2</sub>PO<sub>4</sub>: 1.2 mM; MgSO<sub>4</sub>: 0.8 mM. The adventitia and mucosa were removed after cutting the visceral side of the cartilage, then connective tissues were carefully removed during microscopic observation.

### *Isometric Force Measurements*

Muscle strips (width, 0.1–0.2 mm; wet weight, 0.05–0.1 mg) were mounted in 0.1-ml glass cuvettes and continuously superfused at 1.2 ml/min with physiologic salt solution (37°C) aerated with 94% oxygen and 6% carbon dioxide, providing a pH of  $\approx 7.4$ , a partial pressure of oxygen of  $\approx 400$  mmHg, and a partial pressure of carbon dioxide of  $\approx 39$  mmHg in the physiologic salt solution. One end of the muscle strips was anchored with stainless steel microforceps to a stationary metal rod, and the other end was anchored to a calibrated force transducer (model KG4; Scientific Instruments, Hedelberg, Germany). The initial gap between microforceps (*i.e.*, initial muscle length) was set at 5 mm. During a 3-h equilibration period, the length of the muscle strips was increased after subsequent isometric contractions (of 1-min duration) induced by 1  $\mu$ M acetylcholine until isometric force was maximal (optimal length). Each muscle strip was maintained at this optimal length for the remainder of the experiment. These tissues produced maximal isometric forces of 1–3 mN when stimulated with 1  $\mu$ M acetylcholine.

### *Permeabilization Procedure*

The muscle strips were permeabilized with  $\beta$ -escin, as previously described,<sup>13</sup> and validated in the Mayo Clinic and Mayo Foundation laboratory.<sup>1</sup>  $\beta$ -escin creates pores in the smooth muscle cell plasma membrane, thus allowing substances of small molecular weight, such as Ca<sup>2+</sup>, to freely diffuse across the cell membrane. Accordingly,

[Ca<sup>2+</sup>]<sub>i</sub> can be manipulated and controlled by changing the concentration of Ca<sup>2+</sup> in the solution that bathes the smooth muscle strip. Larger cellular proteins necessary for contraction are preserved. Additionally, the membrane receptor-coupled mechanisms that modulate Ca<sup>2+</sup> sensitivity remain intact and can be activated.<sup>1</sup>

After optimal length was set, subsequent experimental protocols were performed at room temperature (25°C) and without aeration of the solutions. Muscle strips were superfused for 20 min, with a relaxing solution that contained 100  $\mu$ M  $\beta$ -escin. The relaxing solution was made up in the following composition using the algorithm of Fabiato and Fabiato:<sup>14</sup> 7.5 mM MgATP, 4 mM ethylene glycol-bis ( $\beta$ -aminoethyl ether)-N,N,N'-tetraacetic acid (EGTA), 20 mM imidazole, 1 mM dithiothreitol, 1 mM free Mg<sup>2+</sup>, 1 nM free Ca<sup>2+</sup>, 10 mM creatine phosphate, and 0.1 mg/ml creatine phosphokinase. Ionic strength was kept constant at 200 mM by adjusting the concentration of potassium acetate. The pH was adjusted to 7.0 at 25°C with potassium hydroxide. After the permeabilization procedure, strips were superfused with the relaxing solution for 10 min to wash out the excess  $\beta$ -escin. The calcium ionophore A23187 (10  $\mu$ M) was added to the relaxing solution and all subsequent experimental solutions to deplete the sarcoplasmic reticulum Ca<sup>2+</sup> stores and maintain [Ca<sup>2+</sup>]<sub>i</sub>.<sup>1</sup> Solutions of varying free Ca<sup>2+</sup> concentrations used in the subsequent experiment also were prepared using the aforementioned algorithm.<sup>14</sup>

### *Experimental Protocols*

**Effects of Anesthetics on Acetylcholine-induced Contraction in Intact Canine Tracheal Smooth Muscle.** Experiments with intact strips were designed to determine what concentrations of drugs should be used in subsequent studies of permeabilized strips. This protocol was performed at 37°C in physiologic salt solution. Muscle strips were contracted for 10 min with 0.03  $\mu$ M acetylcholine, which produced approximately 50% of the maximal force induced by 100  $\mu$ M acetylcholine in preliminary studies (data not shown). After stable contractions were obtained, cumulative doses of ketamine (10<sup>-7</sup> – 10<sup>-3</sup> M), propofol (10<sup>-6</sup> – 10<sup>-3</sup> M), or midazolam (10<sup>-7</sup> – 1.8  $\times$  10<sup>-4</sup> M) were applied, and concentration-response curves for these anesthetics were generated. The effect of 10% intravenous fat emulsion, similar to the vehicle for propofol, also was evaluated. The effect of halothane on intact CTSM was reported in a previous study.<sup>15</sup>

INTRAVENOUS ANESTHETICS AND  $\text{Ca}^{2+}$  SENSITIVITY

**Effects of Anesthetics on  $\text{Ca}^{2+}$  Sensitivity in Permeabilized Canine Tracheal Smooth Muscle.** Experiments with permeabilized strips determined the effects of anesthetics on the  $\text{Ca}^{2+}$  sensitivity in the absence and the presence of muscarinic receptor stimulation. A set of four  $\beta$ -escin permeabilized strips was prepared from the same dog for each experiment. All strips first were contracted maximally with  $10 \mu\text{M}$   $\text{Ca}^{2+}$ ; all subsequent force measurements were normalized to these contractions. Strips were superfused with relaxing solution that contained  $5 \text{ mM}$  inorganic phosphate for  $10 \text{ min}$  and then superfused with relaxing solution for  $10 \text{ min}$  to remove inorganic phosphate. Inorganic phosphate reduces the time necessary for relaxation by accelerating the rate of actomyosin cross-bridge detachment.<sup>16</sup> Each set of four strips was studied as two pairs. All four strips were contracted with  $0.3 \mu\text{M}$   $\text{Ca}^{2+}$  for  $10 \text{ min}$ . One pair was then stimulated with  $10 \mu\text{M}$  acetylcholine and  $10 \mu\text{M}$  guanosine 5'-triphosphate; the other pair continued to be exposed to  $\text{Ca}^{2+}$  alone. After  $10 \text{ min}$ , one of four drugs (one drug for each set of muscles) was added to one strip of each pair for  $15 \text{ min}$ . For ketamine, propofol, and midazolam, an approximate  $\text{EC}_{80}$  concentration was used ( $200$ ,  $270$ , and  $100 \mu\text{M}$ , respectively). For halothane, a concentration equivalent to approximately  $3 \text{ MAC}$  (for dogs, corrected to room temperature<sup>17</sup>) was used. The remaining strip of each pair was not exposed to drugs and served as a time control. In experiments with propofol, an equivalent volume of the vehicle  $10\%$  intravenous fat emulsion was added at the appropriate time for the time-control strips.

**Administration of Halothane.** Halothane was delivered to solutions *via* a calibrated vaporizer. Each solution was equilibrated with halothane for at least  $5 \text{ min}$  (enough time to become equilibrated in our system) before being introduced to the superfusion system. At the end of the protocol, the concentrations of halothane in the solutions at the cuvette were determined by gas chromatography from anaerobically obtained samples using an electron capture detector (model 5880A; Hewlett-Packard, Waltham, MA) according to the method of Van Dyke and Wood.<sup>18</sup>

### Materials

Halothane was purchased from Ayerst Laboratories (New York, NY). Adenosine 5'-triphosphate, disodium salt was purchased from Research Organics (Cleveland, OH). Propofol was purchased from Zeneca Pharmaceuticals (Wilmington, DE). Intravenous fat emulsion,  $10\%$ , was purchased from Baxter Health Care (Deerfield, IL).

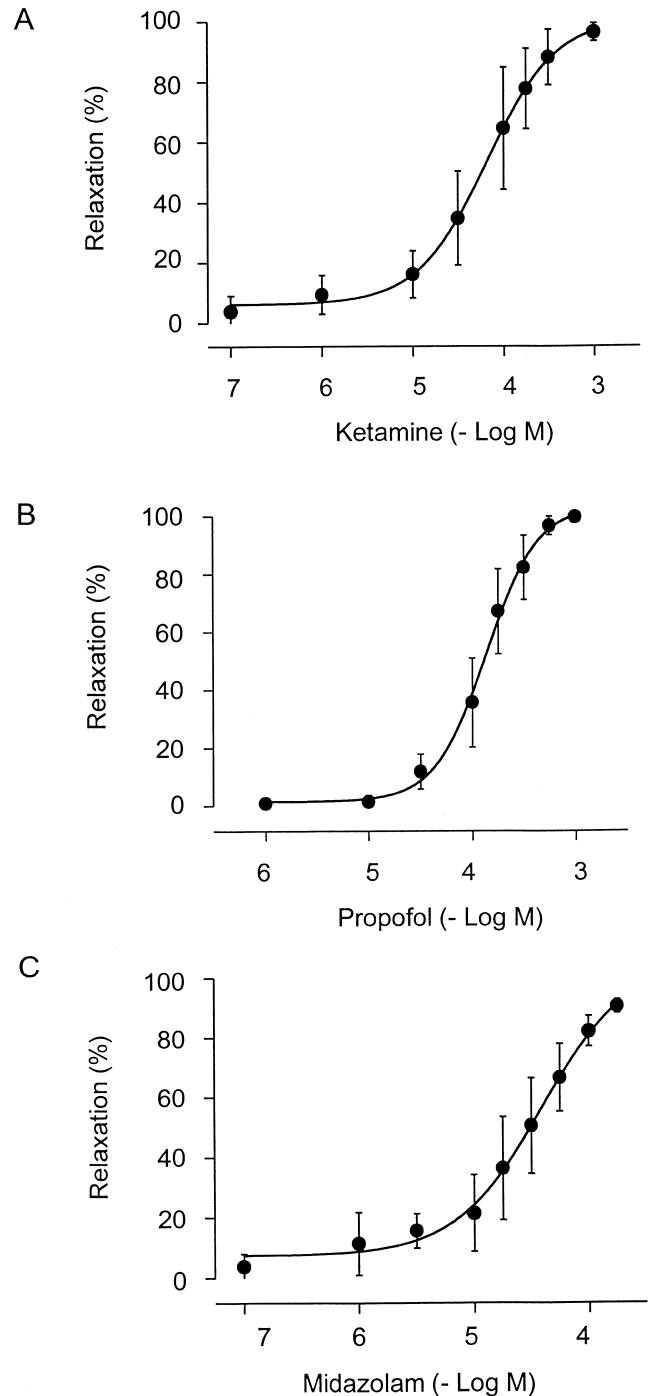

**Fig. 1.** The effect of intravenous anesthetics on isometric force induced by  $0.03 \mu\text{M}$  acetylcholine in intact canine tracheal smooth muscle (CTSM). Ketamine (A), propofol (B), and midazolam (C) relaxed intact CTSM in a concentration-dependent manner. Values are the mean  $\pm$  SD ( $n = 5$ ).

All other drugs and chemicals were purchased from Sigma Chemical (St. Louis, MO). The calcium ionophore A23187 was dissolved in dimethyl sulfoxide (0.05% final concentration). Propofol was diluted from an aqueous emulsion ( $5.6 \times 10^{-2}$  M) in 10% (wt/vol) soybean oil, 2.25% glycerol, and 1.2% purified egg lecithin. All other drugs and chemicals were prepared in distilled filtered water.

### Statistical Analysis

Data are expressed as the mean  $\pm$  SD; n represents the number of dogs. Concentration-response curves for ketamine, propofol, and midazolam were fitted by nonlinear regression (SigmaPlot for Windows Version 4.00; SPSS Inc., Chicago, IL) and used to calculate EC<sub>80</sub> values.

In the first protocol, relaxation produced by anesthetics was expressed as a percent change from the initial force produced by  $0.03 \mu\text{M}$  acetylcholine. In the second protocol, forces were expressed as a percentage of the maximal force induced by  $10 \mu\text{M}$  Ca<sup>2+</sup> determined in each individual strip before the experimental protocol. The decrease in force produced by anesthetics was expressed as a percent relaxation from initial force (before exposure to drug). Initial force was adjusted for the effect of time by using the change in force of the time-matched control strip in each set according to the following formula:

$$\% \text{relaxation} = (1 - (A_2/A_1) \times (C_1/C_2)) \times 100$$

where A<sub>1</sub> is the force of the anesthetic-exposed strip just before exposure to anesthetic, A<sub>2</sub> is the force of the anesthetic-exposed strip at the end of anesthetic exposure, C<sub>1</sub> and C<sub>2</sub> are the forces of the control strip at the matched times with A<sub>1</sub> and A<sub>2</sub>, respectively. All force values represent a change from baseline force (*i.e.*, in relaxing solution). Statistical assessments were made using the paired *t* test. A *P* value < 0.05 was considered to be statistically significant.

## Results

### Effects of Anesthetics on Acetylcholine-induced Contraction in Intact Canine Tracheal Smooth Muscle

Ketamine, propofol, and midazolam all produced concentration-dependent relaxation of intact CTSM strips contracted with acetylcholine (figs. 1A-C). EC<sub>80</sub> values for this effect were 199, 274, and 99  $\mu\text{M}$  for ketamine,

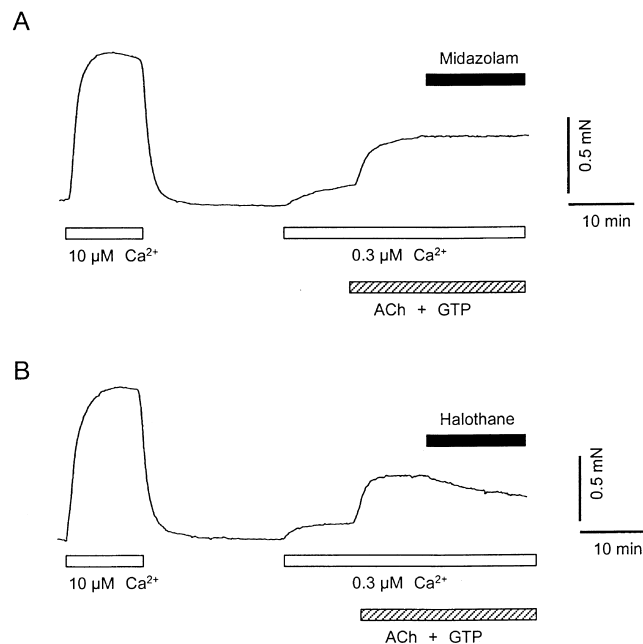

**Fig. 2.** Representative recordings of the application of midazolam (A), and halothane (B) on acetylcholine-induced Ca<sup>2+</sup> sensitization in  $\beta$ -escin-permeabilized canine tracheal smooth muscle. Muscarinic receptor stimulation with  $10 \mu\text{M}$  acetylcholine (ACh) plus  $10 \mu\text{M}$  guanosine 5'-triphosphate (GTP) increased force during exposure to  $0.3 \mu\text{M}$  Ca<sup>2+</sup> (indicating an increase in Ca<sup>2+</sup> sensitivity). Note that halothane, but not midazolam, decreased calcium sensitivity.

propofol, and midazolam, respectively. The vehicle for propofol, 10% intravenous fat emulsion, did not affect contraction (data not shown).

### Effects of Anesthetics on Ca<sup>2+</sup> Sensitivity in Permeabilized Canine Tracheal Smooth Muscle

In  $\beta$ -escin-permeabilized tissue,  $0.3 \mu\text{M}$  Ca<sup>2+</sup> induced stable contractions of  $7.4 \pm 5.5\%$  ( $n = 80$  strips) of the maximal force induced by  $10 \mu\text{M}$  Ca<sup>2+</sup> (fig. 2). The subsequent addition of  $10 \mu\text{M}$  acetylcholine and  $10 \mu\text{M}$  guanosine 5'-triphosphate further increased the force to  $38.7 \pm 10.4\%$  of maximal force after 10 min, indicating an increase in Ca<sup>2+</sup> sensitivity produced by acetylcholine and guanosine 5'-triphosphate. None of the three intravenous anesthetics studied significantly changed force, either in the presence or the absence of receptor stimulation with acetylcholine (figs. 2 and 3). Consistent with our previous work,<sup>1</sup> halothane ( $0.75 \pm 0.05$  mM) significantly reduced force in strips stimulated with acetylcholine (by  $27.8 \pm 13.4\%$ ) but did not change force in strips stimulated only with Ca<sup>2+</sup> (figs. 2 and 3).

INTRAVENOUS ANESTHETICS AND  $\text{Ca}^{2+}$  SENSITIVITY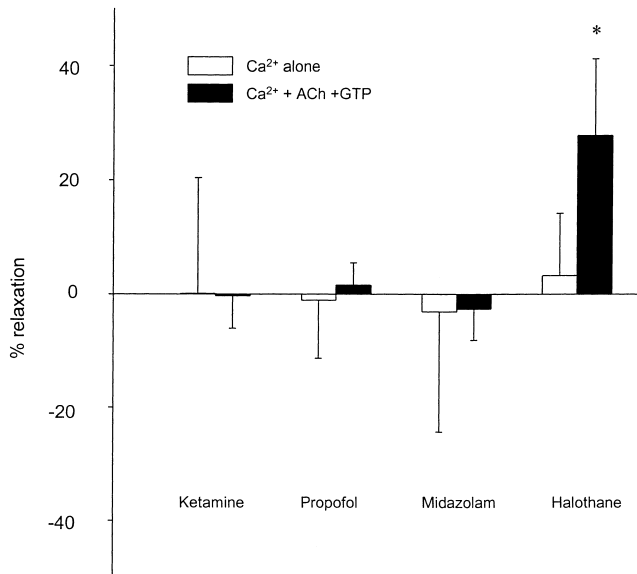

**Fig. 3.** The effect of intravenous anesthetics and halothane on isometric force induced by  $0.3 \mu\text{M}$   $\text{Ca}^{2+}$  in the absence (open columns) and presence (filled columns) of muscarinic receptor stimulation with  $10 \mu\text{M}$  acetylcholine (ACh) and  $10 \mu\text{M}$  guanosine 5'-triphosphate (GTP). Data are expressed as percent relaxation corrected for time (see text). Values are the mean  $\pm$  SD ( $n = 5$ ). \*Significant difference from 0,  $P < 0.05$ .

## Discussion

The major finding of this study in  $\beta$ -escin-permeabilized CTSM is that ketamine, propofol, or midazolam did not affect  $\text{Ca}^{2+}$  sensitivity, either in the presence or the absence of muscarinic receptor stimulation. Therefore, the effect of halothane to inhibit agonist-induced increases in  $\text{Ca}^{2+}$  sensitivity, confirmed in this study, is not a general feature of drugs with anesthetic properties.

Many anesthetic agents act as bronchodilators *in vivo*.<sup>19,20</sup> These drugs depress neural transmission in pathways that innervate airway smooth muscle and also directly affect the smooth muscle cell. In general, these direct effects are caused by a decrease in  $[\text{Ca}^{2+}]_i$ , a decrease in the force maintained for a particular  $[\text{Ca}^{2+}]_i$  (*i.e.*, the  $\text{Ca}^{2+}$  sensitivity), or a combination of both mechanisms. It is clear that during submaximal contraction of airway and other types of smooth muscle, anesthetic-induced relaxation is associated with a decrease in  $[\text{Ca}^{2+}]_i$ . This is true for the volatile anesthetics<sup>3,21,22</sup> and for the three intravenous anesthetics evaluated in our study: ketamine,<sup>7,10</sup> propofol,<sup>10</sup> and midazolam.<sup>11</sup> For these intravenous anesthetics, decreases in  $[\text{Ca}^{2+}]_i$  are caused by inhibition of  $\text{Ca}^{2+}$  influx through L-type voltage-operated  $\text{Ca}^{2+}$  channels.<sup>6,10</sup> Although volatile anesthetics may affect intracellular  $\text{Ca}^{2+}$  stores,<sup>3</sup> these intra-

venous anesthetics do not appear to do so in studies to date.<sup>9,11</sup> The barbiturates, the other major class of intravenous induction agents used clinically, also may depress airway neural transmission in intact animals but, in most recent studies, do not affect or actually cause contraction of isolated airway smooth muscle.<sup>23,24</sup> In preliminary studies, we found little effect of thiopental on canine airway smooth muscle (data not shown) and therefore elected not to study this agent further.

Although it is clear that anesthetics relax airway smooth muscle in part by decreasing  $[\text{Ca}^{2+}]_i$ , inhibition of  $\text{Ca}^{2+}$  sensitivity also may be important. We evaluated  $\text{Ca}^{2+}$  sensitivity by using a  $\beta$ -escin-permeabilized smooth muscle preparation. The creation of pores in the plasma membrane permits the manipulation of the intracellular environment by changing the composition of the fluid that bathes the smooth muscle, such that  $\text{Ca}^{2+}$  sensitivity may be directly studied.<sup>1,13</sup> Contraction of this preparation is produced by exposing it to  $\text{Ca}^{2+}$ ; exposure to muscarinic receptor agonists produces additional force (fig. 2). The binding of  $\text{Ca}^{2+}$  to calmodulin increases myosin light chain kinase activity and phosphorylation of the 20-kd regulatory myosin light chain (rMLC).<sup>25,26</sup> Regulatory myosin light chain phosphorylation allows the binding of myosin to actin, which increases actomyosin adenosine triphosphatase activity and causes contraction.<sup>2</sup> Muscarinic receptor stimulation activates a cascade of G proteins that inhibit smooth muscle protein phosphatases, increasing regulatory myosin light chain phosphorylation and, thus, force.<sup>27,28</sup> A previous study from our laboratory showed that permeabilization of CTSM with  $\beta$ -escin eliminates  $\text{Ca}^{2+}$  gradients across the sarcolemma and maintains  $[\text{Ca}^{2+}]_i$  during muscarinic receptor stimulation and that the coupling of membrane receptors to mechanisms that increase  $\text{Ca}^{2+}$  sensitivity remain intact and can be activated.<sup>1</sup>

We confirmed our previous finding that halothane significantly decreases  $\text{Ca}^{2+}$  sensitivity during muscarinic receptor stimulation of the permeabilized preparation exposed to a submaximal concentration of  $\text{Ca}^{2+}$ .<sup>1</sup> However, none of the three intravenous anesthetics studied (at approximate  $\text{ED}_{80}$  concentrations for relaxation of intact muscle) significantly affected the force produced by constant submaximal  $[\text{Ca}^{2+}]_i$ , either in the presence or the absence of muscarinic receptor stimulation. Yoshimura *et al.*<sup>11</sup> also found no effect of midazolam on  $\text{Ca}^{2+}$  sensitivity measured in an intact CTSM preparation. Taken together with previous studies of the effects of these drugs on  $[\text{Ca}^{2+}]_i$ , we conclude that, at concentrations producing near-maximal effect, these drugs relax

CTSM exclusively by decreasing  $[Ca^{2+}]_i$ , without affecting  $Ca^{2+}$  sensitivity. Although comparisons should be made with caution, these  $ED_{80}$  concentrations of drugs considerably exceed the reported plasma concentrations that produce surgical anesthesia in humans (approximately 2–60  $\mu M$ ,<sup>29</sup> 20–50  $\mu M$ ,<sup>30,31</sup> and 1–2  $\mu M$ <sup>32</sup> for ketamine, propofol, and midazolam, respectively). When the fact that these drugs are significantly protein-bound (> 95% for propofol and midazolam)<sup>30,31,33</sup> is also taken into account, it is almost certain that they would not affect  $Ca^{2+}$  sensitivity as clinically used.

In conclusion, three intravenous anesthetics (ketamine, propofol, and midazolam) directly relax canine airway smooth muscle stimulated with a muscarinic agonist without affecting  $Ca^{2+}$  sensitivity. Thus, inhibition of agonist-induced increases in  $Ca^{2+}$  sensitivity of CTSM is not a common property of anesthetics but is unique to the volatile agents.

The authors thank Dr. Tetsuya Kai, Department of Anesthesiology and Critical Care Medicine, Faculty of Medicine, Kyushu University, Fukuoka, Japan, for helpful suggestions and Darell L. Loeffler for measuring anesthetic concentration by gas chromatography.

## References

- Akao M, Hirasaki A, Jones KA, Wong GY, Bremerich DH, Warner DO: Halothane reduces myofilament  $Ca^{2+}$  sensitivity during muscarinic receptor stimulation of airway smooth muscle. *Am J Physiol* 1996; 271:L719–25
- Somlyo AP, Somlyo AV: Signal transduction and regulation in smooth muscle. *Nature* 1994; 372:231–6
- Jones KA, Housmans PR, Warner DO, Lorenz RR, Rehder K: Halothane alters cytosolic calcium transient in tracheal smooth muscle. *Am J Physiol* 1993; 265:L80–6
- Jones KA, Hirasaki A, Bremerich DH, Jankowski C, Warner DO: Halothane inhibits agonist-induced potentiation of rMLC phosphorylation in permeabilized airway smooth muscle. *Am J Physiol* 1997; 273:L80–5
- Kai T, Bremerich DH, Jones KA, Warner DO: Drug-specific effects of volatile anesthetics on  $Ca^{2+}$  sensitization in airway smooth muscle. *Anesth Analg* 1998; 87:425–9
- Hirota K, Zsigmond EK, Matsuki A, Rabito SF: Ketamine inhibits contractile responses of intestinal smooth muscle by decreasing the influx of calcium through the L-type calcium channel. *Acta Anaesthesiol Scand* 1995; 39:759–64
- Pabelick CM, Jones KA, Street K, Lorenz RR, Warner DO: Calcium concentration-dependent mechanisms through which ketamine relaxes canine airway smooth muscle. *ANESTHESIOLOGY* 1997; 86:1104–11
- Pedersen CM, Thirstrup S, Nielsen-Kudsk JE: Smooth muscle relaxant effects of propofol and ketamine in isolated guinea-pig trachea. *Eur J Pharmacol* 1993; 238:75–80
- Kanmura Y, Yoshitake J, Casteels R: Ketamine-induced relaxation in intact and skinned smooth muscles of the rabbit ear artery. *Br J Pharmacol* 1989; 97:591–7
- Yamakage M, Hirshman CA, Croxton TL: Inhibitory effects of thiopental, ketamine, and propofol on voltage-dependent  $Ca^{2+}$  channels in porcine tracheal smooth muscle cells. *ANESTHESIOLOGY* 1995; 83:1274–82
- Yoshimura H, Kai T, Nishimura J, Kobayashi S, Takahashi S, Kanaide H: Effects of midazolam on intracellular  $Ca^{2+}$  and tension in airway smooth muscles. *ANESTHESIOLOGY* 1993; 83:1009–20
- Koga Y, Sato S, Sodeyama N, Takahashi M, Kato M, Iwatsuki N, Hashimoto Y: Comparison of the relaxant effects of diazepam, flunitrazepam and midazolam on airway smooth muscle. *Br J Anaesth* 1992; 69:65–9
- Kobayashi S, Kitazawa T, Somlyo AV, Somlyo AP: Cytosolic heparin inhibits muscarinic and  $\alpha$ -adrenergic  $Ca^{2+}$  release in smooth muscle. Physiological role of inositol 1,4,5-triphosphate in pharmacomechanical coupling. *J Biol Chem* 1989; 264:17997–8004
- Fabiato A, Fabiato F: Calculator programs for computing the composition of the solutions containing multiple metals and ligands used for experiments in skinned muscle cells. *J Physiol Paris* 1979; 75:463–505
- Yamamoto K, Morimoto N, Warner DO, Rehder K, Jones KA: Factors influencing the direct actions of volatile anesthetics on airway smooth muscle. *ANESTHESIOLOGY* 1993; 78:1102–11
- Itoh T, Kanmura Y, Kuriyama H: Inorganic phosphate regulates the contraction-relaxation cycle in skinned muscles of the rabbit mesenteric artery. *J Physiol (Lond)* 1986; 376:231–52
- Franks NP, Lieb WR: Temperature dependence of the potency of volatile general anesthetics. *ANESTHESIOLOGY* 1996; 84:716–20
- Van Dyke RA, Wood CL: Binding of radioactivity from  $^{14}C$ -labeled halothane in isolated perfused rat livers. *ANESTHESIOLOGY* 1973; 38:328–32
- Reich DL, Silvy G: Ketamine: An update on the first twenty-five years of clinical experience. *Can J Anaesth* 1989; 36:186–97
- Pizov R, Brown RH, Weiss YS, Baranov D, Hennes H, Baker S, Hirshman CA: Wheezing during induction of general anesthesia in patients with and without asthma. *ANESTHESIOLOGY* 1995; 82:1111–6
- Yamakage M: Direct inhibitory mechanisms of halothane on canine tracheal smooth muscle contraction. *ANESTHESIOLOGY* 1992; 77:546–53
- Yamakage M, Kohro S, Kawamata T, Namiki A: Inhibitory effects of four inhaled anesthetics on canine tracheal smooth muscle contraction and intracellular  $Ca^{2+}$  concentration. *Anesth Analg* 1993; 77:67–72
- Lenox WC, Mitzner W, Hirshman CA: Mechanism of thiopental-induced constriction of guinea pig trachea. *ANESTHESIOLOGY* 1990; 72:921–5
- Jackson DM, Beckett PJ, Dixon M, Richards IM: The action of barbiturates on contractile responses of canine and feline bronchial smooth muscle. *Eur J Pharmacol* 1982; 80:191–6
- Gerthoffer WT, Murphy RA: Myosin phosphorylation and regulation of cross-bridge cycle in tracheal smooth muscle. *Am J Physiol* 1983; 244:C182–7
- Silver PJ, Stull JT: Phosphorylation of myosin light chain and phosphorylase in tracheal smooth muscle in response to KCl and carbachol. *Mol Pharmacol* 1984; 25:267–74
- Kitazawa T, Gaylann BD, Denny GH, Somlyo AP: G-protein-mediated  $Ca^{2+}$  sensitization of smooth muscle contraction through

INTRAVENOUS ANESTHETICS AND Ca<sup>2+</sup> SENSITIVITY

myosin light chain phosphorylation. *J Biol Chem* 1991; 266:1708-15

28. Kitazawa T, Kobayashi S, Horiuti K, Somlyo AV, Somlyo AP: Receptor-coupled, permeabilized smooth muscle. Role of the phosphatidylinositol cascade, G-proteins, and modulation of the contractile response to Ca<sup>2+</sup>. *J Biol Chem* 1989; 264:5339-42

29. Idvall J, Ahlgren I, Aronsen KF, Stenberg P: Ketamine infusions: Pharmacokinetics and clinical effects. *Br J Anaesth* 1979; 51:1167-73

30. Kirkpatrick T, Cockshott ID, Douglas EJ, Nimmo WS: Pharma-

cokinetics of propofol (Diprivan) in elderly patients. *Br J Anaesth* 1988; 60:146-50

31. Servin F, Desmots JM, Haberer JP, Cockshott ID, Plummer GF, Farinotti R: Pharmacokinetics and protein binding of propofol in patients with cirrhosis. *ANESTHESIOLOGY* 1988; 69:887-91

32. Nilsson A, Tamsen A, Persson P: Midazolam-fentanyl anesthesia for major surgery. Plasma levels of midazolam during prolonged total intravenous anesthesia. *Acta Anaesthesiol Scand* 1986; 30:66-9

33. Dundee JW: New I.V. Anaesthetics. *Br J Anaesth* 1979; 51:641-8
